# Supplementary material
Source: PubMed Central journal article supplement (PMC5869089)
Supplement: NIHMS908535-supplement-supplement_1.pdf [file NIHMS908535-supplement-supplement_1.pdf]

**Supplemental Figure 1.** Relative abundance of the 30 most abundant operational taxonomic units (OTUs) before and after dietary intervention in subjects with paired baseline and 6-month samples.

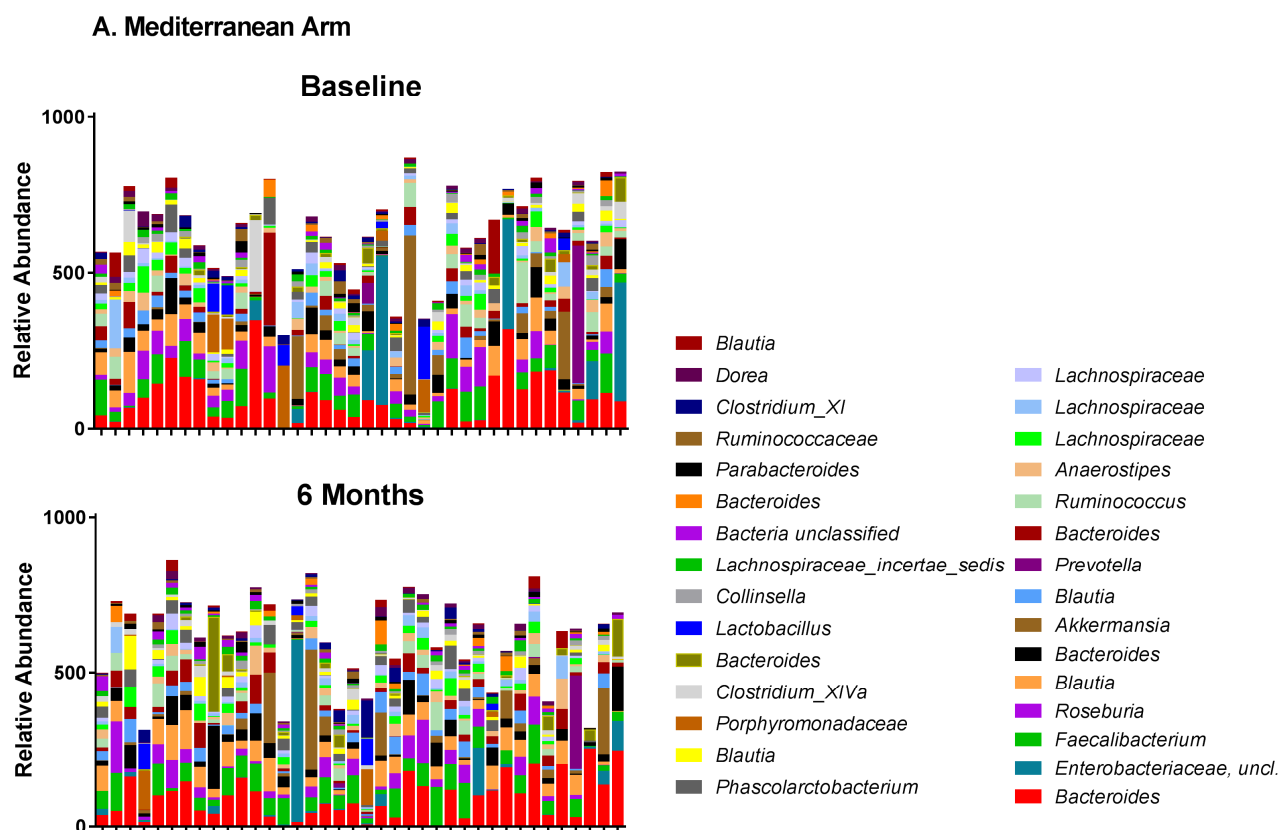

## B. Healthy Eating Arm

Baseline

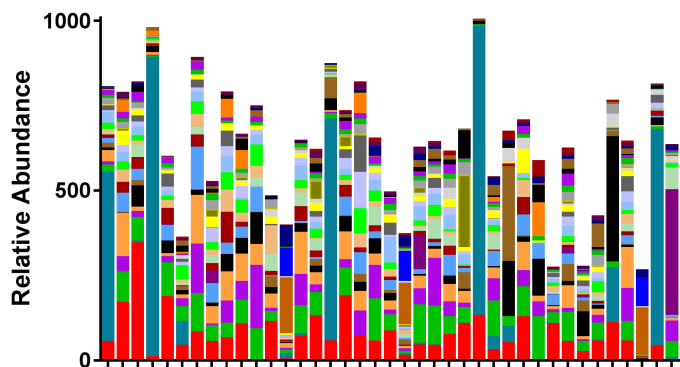

6 Months

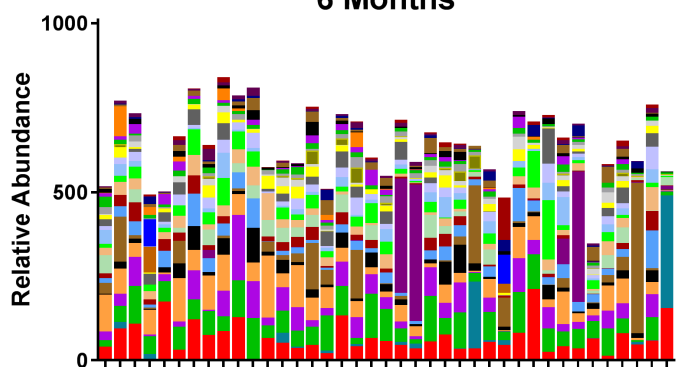

**Supplemental Table 1.** Spearman correlation coefficients of the relative abundance of bacteria from colonic mucosa with BMI, serum measures of metabolic health and serum carotenoids at baseline in 88 subjects. Significant associations, after correction for false discovery rates (FDR) using the Benjamini-Hochberg method ( $p \leq 0.015$ ), are starred. There were no significant correlations of bacterial variables with age after FDR correction. The phyla, families and genera shown are from summing appropriate operational taxonomic units (OTUs) after subsampling data to 1047 sequences per sample.

| Bacterial Taxa                                                                                                                                        | BMI (kg/m <sup>2</sup> ) | Triglycerides | CRP    | HOMA2-IR | LPS binding protein | LDL    | HDL     | Total Carotenoids |
|-------------------------------------------------------------------------------------------------------------------------------------------------------|--------------------------|---------------|--------|----------|---------------------|--------|---------|-------------------|
| Indices                                                                                                                                               |                          |               |        |          |                     |        |         |                   |
| Shannon Diversity, <i>H</i>                                                                                                                           | 0.174                    | -0.113        | -0.013 | 0.018    | -0.141              | -0.054 | 0.046   | 0.022             |
| Inverse Simpson                                                                                                                                       | 0.177                    | -0.063        | 0.012  | 0.014    | -0.091              | -0.075 | -0.003  | -0.018            |
| $\theta_{VC}$ Inter-individual Distances                                                                                                              | -0.224                   | -0.251        | -0.216 | -0.285   | -0.214              | 0.191  | 0.323*  | 0.409*            |
| Phyla                                                                                                                                                 |                          |               |        |          |                     |        |         |                   |
| Actinobacteria                                                                                                                                        | 0.057                    | -0.113        | 0.082  | -0.009   | 0.020               | 0.090  | 0.040   | 0.066             |
| Bacteroidetes                                                                                                                                         | -0.015                   | 0.155         | 0.087  | 0.114    | 0.067               | 0.003  | 0.104   | 0.002             |
| Firmicutes                                                                                                                                            | 0.311*                   | 0.117         | 0.121  | 0.246    | 0.099               | -0.152 | -0.272* | -0.353*           |
| Proteobacteria                                                                                                                                        | -0.272*                  | -0.357*       | -0.102 | -0.280*  | -0.095              | 0.076  | 0.196   | 0.269*            |
| Verrucomicrobia                                                                                                                                       | -0.122                   | -0.281*       | -0.041 | -0.115   | -0.076              | -0.037 | 0.265*  | 0.135             |
| Families                                                                                                                                              |                          |               |        |          |                     |        |         |                   |
| <i>Lachnospiraceae</i>                                                                                                                                | 0.248                    | 0.280*        | 0.250  | 0.306*   | 0.232               | -0.154 | -0.283* | -0.480*           |
| <i>Ruminocaceae</i>                                                                                                                                   | 0.215                    | 0.034         | 0.033  | 0.146    | 0.003               | -0.078 | -0.184  | -0.146            |
| Genera                                                                                                                                                |                          |               |        |          |                     |        |         |                   |
| <i>Bacteroides</i> (23 OTUs)                                                                                                                          | -0.094                   | 0.192         | 0.192  | 0.126    | 0.158               | -0.060 | -0.080  | -0.162            |
| <i>Prevotella</i> (19 OTUs)                                                                                                                           | 0.027                    | -0.178        | -0.007 | 0.021    | -0.122              | 0.082  | 0.008   | 0.352*            |
| <i>Blautia</i> (11 OTUs)                                                                                                                              | 0.229                    | 0.169         | 0.363* | 0.278*   | 0.293*              | -0.119 | -0.331* | -0.347*           |
| <i>Roseburia</i> (2 OTUs)                                                                                                                             | 0.345*                   | 0.291*        | 0.070  | 0.353*   | 0.135               | -0.172 | -0.398* | -0.445*           |
| <i>Akkermansia</i> (1 OTU)                                                                                                                            | -0.121                   | -0.281*       | -0.041 | -0.115   | -0.076              | -0.036 | 0.264   | 0.135             |
| Individual OTUs identified from linear discriminant analysis effect size (LEfSE) to Differ by Total Carotenoid Tertile, with taxonomic classification |                          |               |        |          |                     |        |         |                   |
| OTU24; <i>Coriobacteriaceae</i> , <i>Collinsella</i>                                                                                                  | 0.168                    | 0.069         | 0.192  | 0.129    | 0.029               | 0.055  | -0.039  | -0.181            |
| OTU1; <i>Bacteroidaceae</i> <i>Bacteroides</i>                                                                                                        | 0.015                    | 0.226         | 0.213  | 0.154    | 0.275*              | -0.051 | -0.183  | -0.286*           |

|                                                            |        |        |        |        |        |        |         |         |
|------------------------------------------------------------|--------|--------|--------|--------|--------|--------|---------|---------|
| OTU102;<br><i>Porphyromonadaceae</i><br><i>Odoribacter</i> | 0.073  | 0.084  | 0.181  | 0.211  | 0.180  | -0.011 | -0.145  | -0.216  |
| OTU3;<br><i>Lachnospiraceae</i><br><i>Blautia</i>          | 0.227  | 0.111  | 0.340* | 0.276* | 0.344* | -0.166 | -0.321* | -0.352* |
| OTU4;<br><i>Lachnospiraceae</i><br><i>Roseburia</i>        | 0.369* | 0.288* | 0.065  | 0.349* | 0.156  | -0.151 | -0.404* | -0.438* |
| OTU75; Firmicutes<br>unclassified                          | 0.008  | -0.256 | 0.039  | 0.016  | 0.025  | 0.087  | 0.005   | 0.149   |
| OTU20;<br><i>Lachnospiraceae</i><br><i>incertae sedis</i>  | 0.276* | 0.138  | 0.325* | 0.266* | 0.156  | -0.062 | -0.266* | -0.315* |
| OTU12;<br><i>Lachnospiraceae</i><br>unclassified           | 0.379* | 0.192  | 0.168  | 0.380* | 0.228  | -0.190 | -0.348* | -0.402* |
| OTU45;<br><i>Lachnospiraceae</i><br>unclassified           | 0.443* | 0.431* | 0.309* | 0.437* | 0.333* | -0.024 | -0.425* | -0.339* |
| OTU118;<br><i>Lachnospiraceae</i><br>unclassified          | 0.173  | 0.110  | 0.074  | 0.110  | -0.012 | 0.080  | -0.145  | -0.261  |
| OTU63; <i>Sutterellaceae</i><br><i>Parasuttrella</i>       | 0.189  | -0.003 | 0.107  | 0.140  | 0.127  | -0.028 | -0.154  | -0.087  |

**Supplemental Table 2.** Spearman correlation coefficients for carotenoid concentrations in A. serum and B. colonic mucosal biopsies with relative bacterial abundance in colon mucosal biopsies. Shown are diversity indices, major phyla, families, genera, and operational taxonomic units (OTUs) identified from linear discriminant analysis effect size (LEfSE) analyses to differ across serum carotenoid tertiles.

**A. Serum**

|                                              | total carotenoids | lycopene | $\alpha$ -carotene | $\beta$ -carotene | lutein | zeaxanthin | $\beta$ -cryptoxanthin |
|----------------------------------------------|-------------------|----------|--------------------|-------------------|--------|------------|------------------------|
| Shannon H                                    | 0.022             | 0.023    | -0.078             | 0.002             | 0.056  | 0.225      | 0.157                  |
| Inverse Simpson                              | -0.018            | 0.031    | -0.092             | -0.023            | -0.012 | 0.171      | 0.124                  |
| $\theta$ -YC Distance                        | 0.409             | 0.207    | 0.115              | 0.378             | 0.335  | 0.204      | 0.206                  |
| Actinobacteria                               | 0.066             | 0.033    | -0.14              | -0.014            | 0.179  | 0.313      | 0.18                   |
| Bacteroidetes                                | 0.002             | -0.12    | -0.009             | -0.011            | 0.032  | 0.092      | 0.119                  |
| Firmicutes                                   | -0.353            | -0.182   | -0.122             | -0.31             | -0.176 | -0.178     | -0.143                 |
| Proteobacteria                               | 0.269             | 0.215    | 0.157              | 0.256             | 0.05   | 0.012      | 0.038                  |
| Verrucomicrobia                              | 0.135             | 0.146    | -0.053             | 0.187             | 0.079  | 0.111      | 0.049                  |
| <i>Lachnospiraceae</i>                       | -0.48             | -0.298   | -0.047             | -0.387            | -0.291 | -0.31      | -0.251                 |
| <i>Ruminococcaceae</i>                       | -0.146            | -0.072   | -0.16              | -0.213            | -0.017 | 0.042      | -0.035                 |
| <i>Bacteroides</i>                           | -0.162            | -0.064   | 0.055              | -0.095            | -0.308 | -0.239     | -0.153                 |
| <i>Prevotella</i>                            | 0.352             | 0.353    | -0.074             | 0.228             | 0.104  | 0.177      | 0.211                  |
| <i>Blautia</i>                               | -0.347            | -0.148   | -0.035             | -0.28             | -0.38  | -0.314     | -0.194                 |
| <i>Roseburia</i>                             | -0.445            | -0.203   | -0.183             | -0.452            | -0.293 | -0.181     | -0.316                 |
| <i>Akkermansia</i>                           | 0.135             | 0.147    | -0.053             | 0.187             | 0.079  | 0.112      | 0.049                  |
| OTU24; <i>Collinsella</i>                    | -0.181            | -0.175   | -0.174             | -0.264            | 0.122  | 0.132      | 0.008                  |
| OTU1; <i>Bacteroides</i>                     | -0.286            | -0.21    | 0.014              | -0.224            | -0.266 | -0.148     | -0.19                  |
| OTU102; <i>Odoribacter</i>                   | -0.216            | -0.158   | -0.064             | -0.202            | -0.093 | 0.028      | -0.079                 |
| OTU3; <i>Blautia</i>                         | -0.352            | -0.19    | -0.075             | -0.302            | -0.352 | -0.312     | -0.19                  |
| OTU4; <i>Roseburia</i>                       | -0.438            | -0.222   | -0.178             | -0.452            | -0.287 | -0.159     | -0.314                 |
| OTU75; Firmicutes unclassified               | 0.149             | 0.152    | 0.046              | 0.027             | 0.161  | 0.157      | 0.118                  |
| OTU20; <i>Lachnospiraceae incertae sedis</i> | -0.315            | -0.206   | -0.111             | -0.329            | -0.264 | -0.296     | -0.16                  |
| OTU12; <i>Lachnospiraceae unclassified</i>   | -0.402            | -0.189   | -0.072             | -0.403            | -0.285 | -0.148     | -0.256                 |
| OTU45; <i>Lachnospiraceae unclassified</i>   | -0.339            | -0.186   | -0.092             | -0.365            | -0.272 | -0.185     | -0.1                   |
| OTU118; <i>Lachnospiraceae unclassified</i>  | -0.261            | -0.221   | -0.046             | -0.251            | -0.036 | -0.016     | -0.031                 |
| OTU63; <i>Parasutrella</i>                   | -0.087            | 0.094    | 0.037              | -0.014            | -0.197 | -0.191     | -0.251                 |

## B. Colonic mucosa

|                                              | total<br>carotenoids | lycopene | $\alpha$ -carotene | $\beta$ -carotene | lutein | zeaxanthin | $\beta$ -cryptoxanthin |
|----------------------------------------------|----------------------|----------|--------------------|-------------------|--------|------------|------------------------|
| Shannon                                      | 0.029                | -0.008   | -0.085             | 0.051             | -0.014 | 0.05       | 0.052                  |
| Inverse Simpson                              | 0.019                | 0.021    | -0.09              | 0.057             | -0.031 | 0.01       | 0.027                  |
| $\theta$ -YC Distance                        | 0.071                | -0.088   | -0.068             | 0.029             | 0.164  | 0.126      | 0.173                  |
| Actinobacteria                               | 0.085                | 0.066    | 0.062              | 0.082             | 0.11   | 0.132      | 0.063                  |
| Bacteroidetes                                | -0.138               | -0.13    | -0.033             | -0.123            | -0.107 | -0.011     | -0.072                 |
| Firmicutes                                   | 0.013                | 0.044    | 0.002              | 0.046             | -0.055 | -0.006     | -0.082                 |
| Proteobacteria                               | -0.164               | -0.087   | -0.138             | -0.181            | -0.157 | -0.227     | -0.179                 |
| Verrucomicrobia                              | 0.175                | 0.281    | 0.122              | 0.143             | 0.136  | 0.162      | 0.103                  |
| <i>Lachnospiraceae</i>                       | -0.043               | 0.024    | 0.062              | 0.007             | -0.103 | -0.067     | -0.159                 |
| <i>Ruminococcaceae</i>                       | 0.051                | 0.104    | 0.109              | 0.139             | -0.051 | 0.035      | 0.016                  |
| <i>Bacteroides</i>                           | -0.104               | 0.065    | 0.08               | -0.1              | -0.123 | -0.152     | -0.152                 |
| <i>Prevotella</i>                            | -0.073               | 0.043    | -0.183             | -0.097            | -0.091 | -0.058     | -0.109                 |
| <i>Blautia</i>                               | -0.083               | 0.075    | 0.054              | 0.028             | -0.196 | -0.11      | -0.159                 |
| <i>Roseburia</i>                             | 0.047                | 0.137    | 0.082              | 0.007             | -0.053 | 0.042      | -0.111                 |
| <i>Akkermansia</i>                           | 0.176                | 0.281    | 0.123              | 0.143             | 0.135  | 0.163      | 0.104                  |
| OTU24; <i>Collinsella</i>                    | 0.041                | 0.057    | 0.093              | -0.002            | 0.029  | 0.015      | -0.082                 |
| OTU1; <i>Bacteroides</i>                     | -0.209               | -0.019   | -0.009             | -0.184            | -0.207 | -0.215     | -0.251                 |
| OTU102; <i>Odoribacter</i>                   | -0.071               | 0.022    | 0.002              | 0.137             | -0.112 | 0.026      | -0.102                 |
| OTU3; <i>Blautia</i>                         | -0.133               | 0.029    | -0.016             | -0.009            | -0.218 | -0.116     | -0.187                 |
| OTU4; <i>Roseburia</i>                       | 0.023                | 0.1      | 0.067              | 0.02              | -0.076 | 0.019      | -0.106                 |
| OTU75; Firmicutes unclassified               | 0.138                | 0.129    | 0.099              | 0.197             | 0.065  | 0.105      | 0.053                  |
| OTU20; <i>Lachnospiraceae incertae sedis</i> | 0.041                | 0.175    | 0.106              | 0.103             | -0.036 | -0.012     | -0.026                 |
| OTU12; <i>Lachnospiraceae unclassified</i>   | 0.017                | 0.081    | 0.066              | 0.116             | -0.02  | 0.063      | -0.062                 |
| OTU45; <i>Lachnospiraceae unclassified</i>   | -0.243               | -0.057   | -0.106             | -0.152            | -0.321 | -0.261     | -0.171                 |
| OTU118; <i>Lachnospiraceae unclassified</i>  | 0.067                | 0.089    | 0.132              | 0.122             | 0      | 0.024      | 0.029                  |
| OTU63; <i>Parasutrella</i>                   | 0.062                | 0.132    | 0.038              | 0.048             | 0.048  | 0.04       | -0.073                 |
